# Supplementary material for: Metabolomic Signature of Diabetic Kidney Disease in Cerebrospinal Fluid and Plasma of Patients with Type 2 Diabetes Using Liquid Chromatography-Mass Spectrometry
Source: MDPI journal article supplement (doi:10.3390/diagnostics12112626), 2022-10-29
Supplement: s1 [file s1]

(A) Compare Current DKD vs. Without DKD in CSF

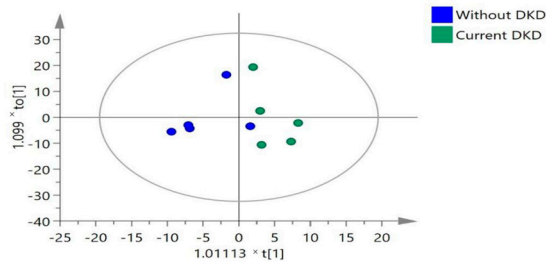

(B) Compare New-onset DKD vs. Without DKD in CSF

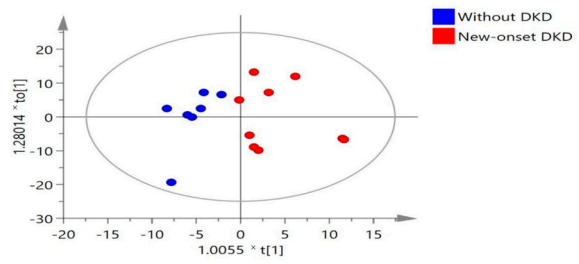

(C) Compare Current DKD vs. Without DKD in plasma

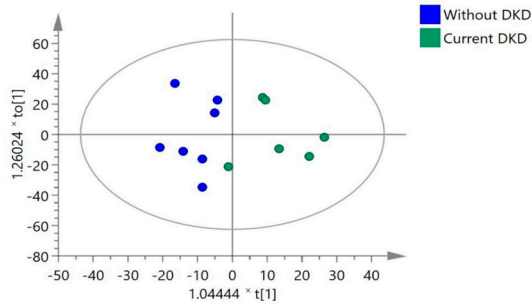

(D) Compare New-onset DKD vs. Without DKD in plasma

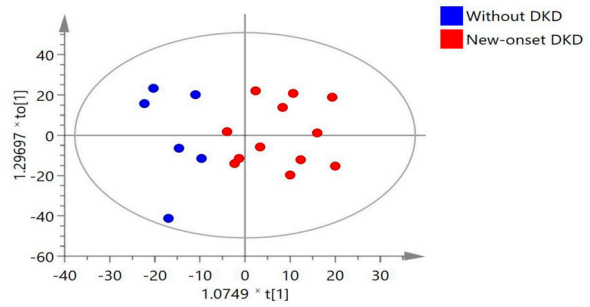

Figure S1: Orthogonal partial least-squares discriminant analysis (OPLS-DA) score plots in (A) CSF samples for comparison between patients with current DKD vs. without DKD (reliability:  $R^2X = 0.611$ ,  $R^2Y = 0.666$ ,  $Q^2 = 0.139$ ), (B) new-onset DKD vs. without DKD (reliability:  $R^2X = 0.599$ ,  $R^2Y = 0.662$ ,  $Q^2 = 0.034$ ). (C) plasma samples for comparison between patients with current DKD vs. without DKD (reliability:  $R^2X = 0.496$ ,  $R^2Y = 0.723$ ,  $Q^2 = 0.246$ ), (D) patients with new-onset DKD vs. without DKD (reliability:  $R^2X = 0.376$ ,  $R^2Y = 0.718$ ,  $Q^2 = 0.247$ ).
